# Supplementary material
Source: PubMed Central journal article supplement (PMC6050590)

Extended data Fig. 5c

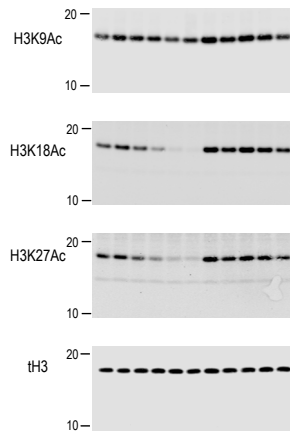

Extended data Fig. 5d

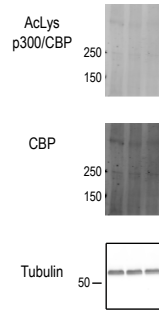

Extended data Fig. 5e

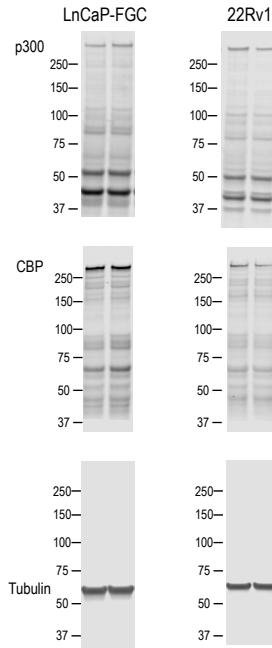

Extended data Fig. 6b

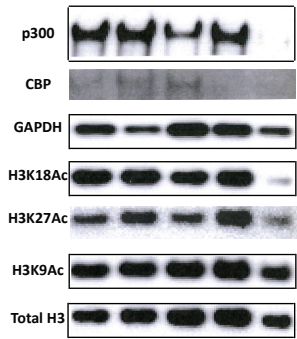

Extended data Fig. 7e

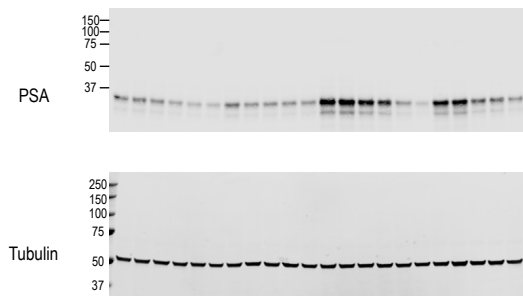

Extended data Fig. 10a

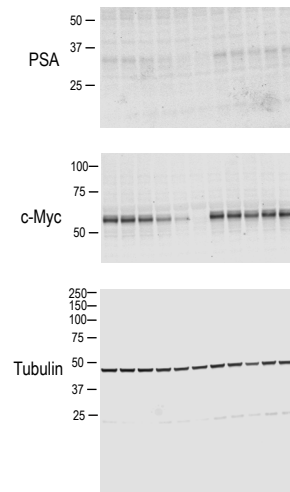

Extended data Fig. 10c

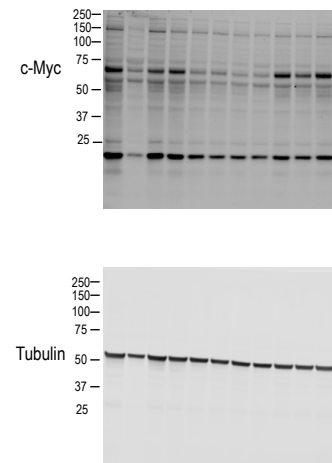

Supplement: NIHMS946753-supplement-Supplementary_Figure_1.pdf [file NIHMS946753-supplement-Supplementary_Figure_1.pdf]
