# Supplementary material
Source: PubMed Central journal article supplement (PMC6050590)
Supplement: NIHMS946753-supplement-Supplementary_Information.pdf [file NIHMS946753-supplement-Supplementary_Information.pdf]

1 **Supplementary Information**

2 **Discovery of a potent catalytic p300/CBP inhibitor that targets lineage-specific tumors**

3  
4 Loren M. Lasko<sup>1\*</sup>, Clarissa G. Jakob<sup>1\*</sup>, Rohinton P. Edalji<sup>1</sup>, Wei Qiu<sup>1</sup>, Debra Montgomery<sup>1</sup>, Enrico L.  
5 Digiammarino<sup>1</sup>, T. Matt Hansen<sup>1</sup>, Roberto M. Risi<sup>1</sup>, Robin Frey<sup>1</sup>, Vlasios Manaves<sup>1</sup>, Bailin Shaw<sup>1</sup>, Mikkel  
6 Algire<sup>1</sup>, Paul Hessler<sup>1</sup>, Lloyd T. Lam<sup>1</sup>, Tamar Uziel<sup>1</sup>, Emily Faivre<sup>1</sup>, Debra Ferguson<sup>1</sup>, Fritz G. Buchanan<sup>1</sup>,  
7 Ruth L. Martin<sup>1</sup>, Maricel Torrent<sup>1</sup>, Gary G. Chiang<sup>1,2</sup>, Kannan Karukurichi<sup>3</sup>, J. William Langston<sup>4</sup>, Brian T.  
8 Weinert<sup>5</sup>, Chunaram Choudhary<sup>5</sup>, Peter de Vries<sup>6</sup>, John H. Van Drie<sup>7</sup>, David McElligott<sup>8</sup>, Ed Kesicki<sup>3</sup>,  
9 Ronen Marmorstein<sup>9</sup>, Chaohong Sun<sup>1</sup>, Philip A. Cole<sup>10</sup>, Saul H. Rosenberg<sup>1</sup>, Michael R. Michaelides<sup>1</sup>,  
10 Albert Lai<sup>1,11</sup>, and Kenneth D. Bromberg<sup>1,11</sup>

11 \*These authors contributed equally to this study

12 <sup>1</sup>Discovery, Global Pharmaceutical Research and Development, AbbVie, 1 North Waukegan Road, North  
13 Chicago, Illinois 60064

14 <sup>2</sup>eFFECTOR Therapeutics, 11180 Roselle St., Suite A, San Diego, CA 92121

15 <sup>3</sup>Petra Pharma Corporation, 430 E. 29th St., Suite 435, New York, NY 10016

16 <sup>4</sup>Faraday Pharmaceuticals, 1616 Eastlake Ave E, Suite 560 Seattle, WA 98102

17 <sup>5</sup> Department of Proteomics, the Novo Nordisk Foundation Center for Protein Research, Faculty of  
18 Health and Medical Sciences, University of Copenhagen, Blegdamsvej 3B, DK-2200 Copenhagen,  
19 Denmark

20 <sup>6</sup>Cascadian Therapeutics, Inc., 2601 Fourth Avenue, Suite 500, Seattle, WA 98121

21 <sup>7</sup>Van Drie Research, 109 Millpond, Andover, MA 01845

22 <sup>8</sup>Accelerator Corporation, 430 East 29th St., New York, NY 10106

23 <sup>9</sup>Perelman School of Medicine, University of Pennsylvania, 421 Curie Blvd., Philadelphia, PA 19104

24 <sup>10</sup>Johns Hopkins University, 725 N. Wolfe St., Baltimore, MD 21205

- 1 <sup>11</sup>Corresponding Authors: Kenneth D. Bromberg ([kenneth.bromberg@abbvie.com](mailto:kenneth.bromberg@abbvie.com)); Albert Lai
- 2 ([Albert.Lai@abbvie.com](mailto:Albert.Lai@abbvie.com))
- 3 Number of figures: 4
- 4 Key words: EP300, CBP, H3K27Ac, histone acetyltransferase, prostate cancer, androgen receptor
- 5 Running title: Discovery of p300/CBP inhibitor A-485
- 6

1 **Supplemental Text**

2 A-485 was primarily metabolized by CYP3A4 *in vitro* indicating that careful consideration should  
3 be taken when considering combinations with other agents that induce, activate, or inhibit  
4 CYP3A4. A-485 also exhibited modest inhibition of CYP2C8 (IC<sub>50</sub>=0.99 μM) and CYP2C9 (IC<sub>50</sub>=1.6  
5 μM). There was no activity toward hERG (>30 μM).

1 **Tool Compound Synthesis**

2 Intermediates were characterized by LC-MS to confirm the structures and purity and carried to the next  
3 step without further purification unless otherwise noted. The schema for synthesis of A-485 is  
4 described below followed by synthesis of indicated intermediates.

5

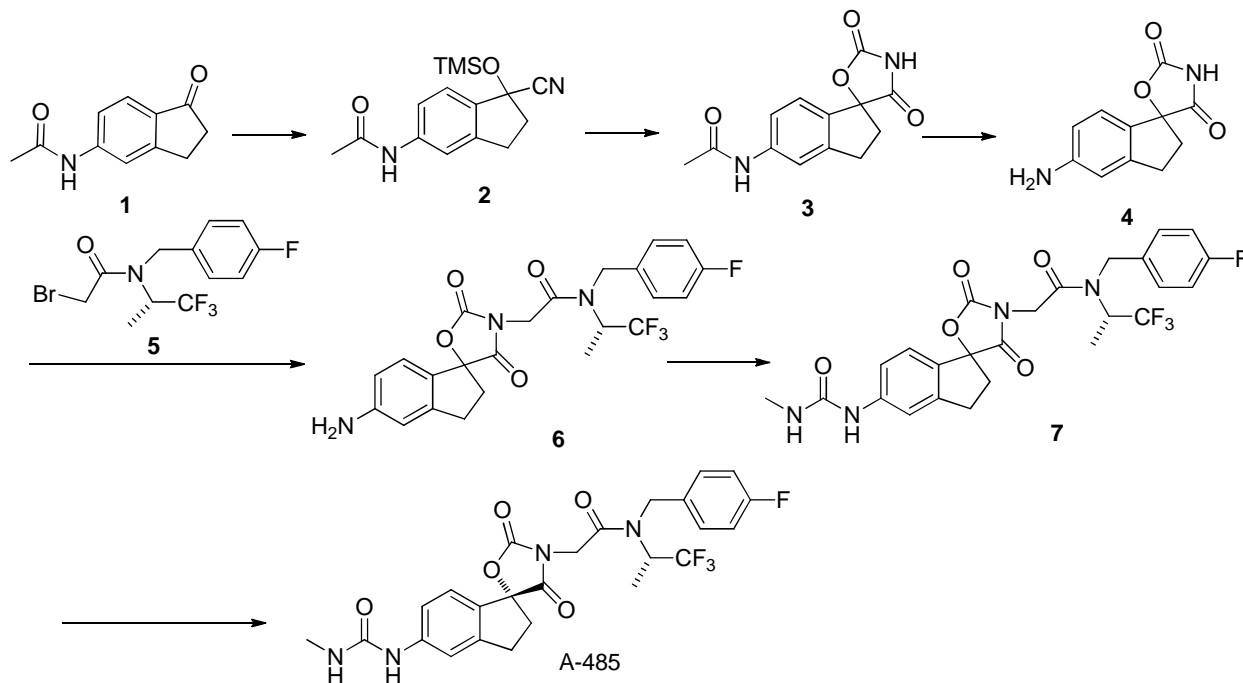

6

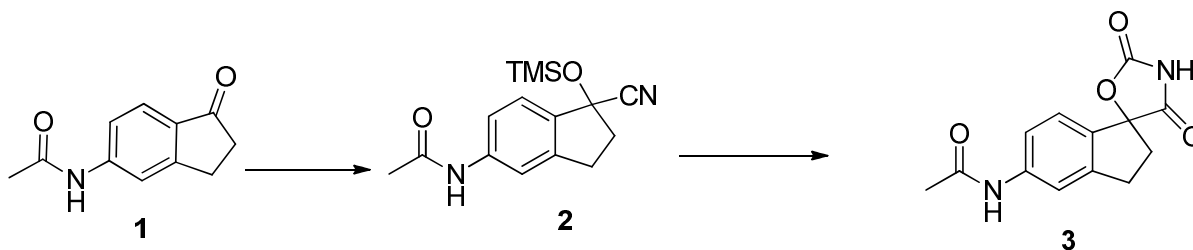

7

8 **N-(1-cyano-1-(trimethylsilyloxy)-2,3-dihydro-1H-inden-5-yl)acetamide (2):**

9 To a stirring solution of 1 (commercially available) (31 g, 164 mmol) in toluene and MeCN (400  
10 mL/400 mL) was added ZnI<sub>2</sub> (5.2g, 16.4 mmol) and TMSCN (33 g, 328 mmol). The mixture was heated at  
11 reflux for 1 hour, then treated with an additional 33g of TMSCN and 4 g of zinc iodide and refluxed for  
12 an additional 2 h. The reaction was cooled and the solvent from reaction mixture was removed under  
13 reduced pressure. The residue was purified by silica gel column chromatography to afford compound 2  
14 (14 g, 30%).

1  
2  
3 ***N*-(2',4'-dioxo-2,3-dihydrospiro[indene-1,5'-ozazolidine]-5-yl)acetamide (3):**

4 Compound **2** (11.5 g, 39.8 mmol) was dissolved in EtOH (160 mL), cooled with ice bath to 0  
5 degrees and HCl gas was bubbled in for 2 h.(Exothermic reaction). The solvent was removed under  
6 reduced pressure. The residue was partitioned between Ethyl acetate and aq. NaHCO<sub>3</sub>, the organic  
7 extract was dried, concentrated and triturated with 1 to 1 mixture of petroleum ether and Ethyl Acetate.  
8 The crude product ethyl 5-acetamido-1-hydroxy-2,3-dihydro-1H-indene-1-carbimidate (7.6 g) was used  
9 directly for subsequent step.

10 A solution of crude product (7.6 g) in THF (150 mL) and triethylamine (6g, 58 mmol) was  
11 cooled to 5 °C and carefully treated with a solution of triphosgene (4.3 g, 14.5 mmol) in 20 ml THF, so as  
12 to maintain temperature below 10 °C. The mixture was stirred for 1 h, treated with 6N HCl until pH2,  
13 and the resultant mixture was stirred at 5 °C for an additional 30 minutes. About half the volume of the  
14 solvent from the reaction mixture was removed under reduced pressure and the remaining mixture was  
15 partitioned between water and Ethyl acetate. The organic extract was dried, concentrated, and the  
16 residue was purified by silica gel column chromatography to afford *N*-(2',4'-dioxo-2,3-  
17 dihydrospiro[indene-1,5'-ozazolidine]-5-yl)acetamide (**3**) (5.89 g, 57%) as a yellow solid. LC-MS:  $m/z =$   
18 261[M+H]<sup>+</sup>  
19  
20

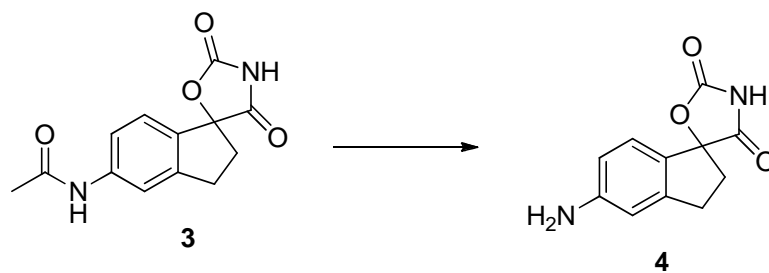

23 **5-amino-2,3-dihydrospiro[indene-1,5'-ozazolidine]-2',4'-dione (4):**

24 To a stirring suspension of intermediate **3** (29.5 g, 113 mmol) in CH<sub>3</sub>OH (300 mL) was added  
25 concentrated HCl aqueous solution (75 mL). The resulting mixture was heated to reflux for 3 h. The  
26 precipitate was filtered and dried to afford **4** (16 g, 65%) as a yellow solid. LC-MS:  $m/z = 219.1$  [M+H]<sup>+</sup>  
27

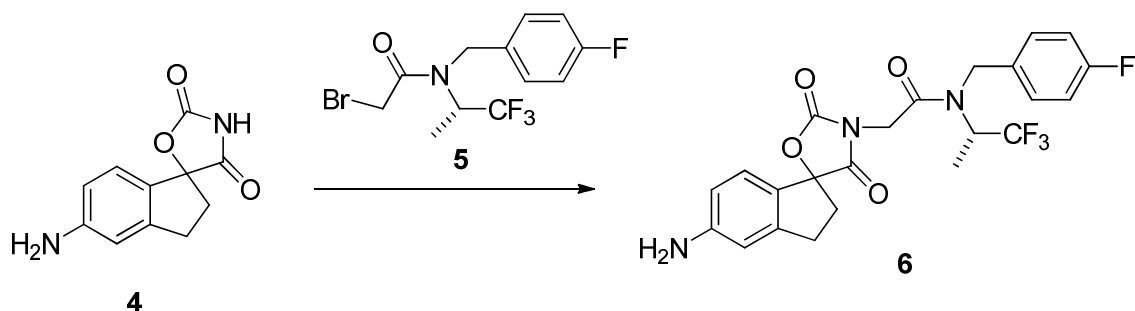

1  
2 **2-(5-amino-2',4'-dioxo-2,3-dihydrospiro[indene-1,5'-oxazolidine]-3'-yl)-N-(4-fluorobenzyl)-N-((S)-1,1,1-**  
3 **trifluoropropan-2-yl)acetamide (6):**

4 To a solution of **4** (27.7 g, 127 mmol) and **5** (43.5 g, 127 mmol) in DMF (200 mL) was added  
5  $K_2CO_3$  (52.6 g, 381 mmol). The reaction mixture was then stirred at RT for 2 h, quenched with water,  
6 extracted with EtOAc, washed with water and brine, dried, concentrated under reduced pressure, and  
7 purified by silica gel column chromatography (methanol:  $CH_2Cl_2$  = 1:20) to afford **6** (43.9 g, 72%) as a  
8 white solid. LC-MS:  $m/z$  = 480.0  $[M+H]^+$

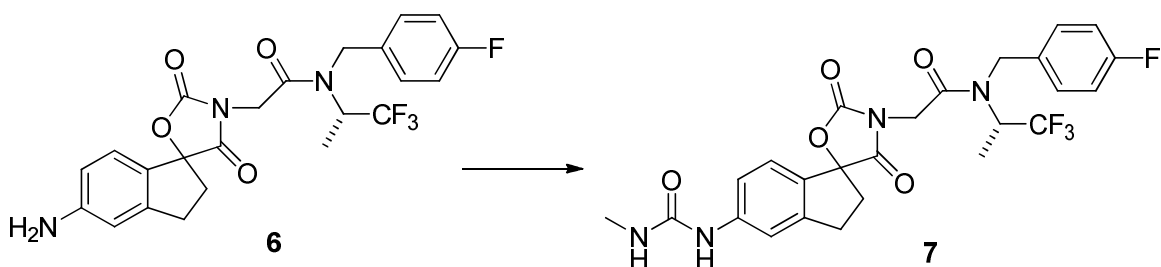

10  
11  
12 **N-(4-fluorobenzyl)-2-(5-(3-methylureido)-2',4'-dioxo-2,3-dihydrospiro[indene-1,5'-oxazolidine]-3'-yl)-**  
13 **N-((S)-1,1,1-trifluoropropan-2-yl)acetamide (7):**

14 To a stirring solution of intermediate **6** (8.6 g, 18 mmol) in THF (100 mL) was added  $Et_3N$  (7.5  
15 mL, 54 mmol) followed by triphosgene (2.7 g, 9 mmol) in one portion at room temperature (exothermic  
16 reaction). The reaction mixture was stirred at room temperature for 30 min, and then methyl amine (2M  
17 in THF, 45 mL, 90 mmol) was added and stirred at room temperature for an additional 0.5 h. After  
18 consumption of the starting material (by TLC), the reaction mixture was diluted with water and EtOAc.  
19 Combined organic extracts were dried over anhydrous  $Na_2SO_4$  and concentrated under reduced  
20 pressure to obtain crude product, which was purified by silica gel column chromatography eluting with  
21 50% EtOAc/Petroleum Ether to afford compound **7** (7.96 g, 83%) as a yellow solid. LC-MS:  $m/z$  = 537.1  
22  $[M+H]^+$  at RT 4.74 (98.44% purity).  $^1H$  NMR (301 MHz,  $DMSO-d_6$ )  $\delta$  8.72 (s, 1H), 7.55 (s, 1H), 7.41 – 7.32

1 (m, 2H), 7.29 – 7.09 (m, 4H), 6.08 (s, 1H), 5.46 – 5.42 (m, 0.5H), 4.99 – 4.88 (s, 1.5H), 4.83 – 4.69 (m, 1H),  
2 4.68 – 4.54 (m, 1H), 4.24 – 4.16 (m, 1H), 3.13 – 2.95 (m, 2H), 2.67 – 2.47 (m, 5H), 1.43 – 1.32 (m, 3H).  
3

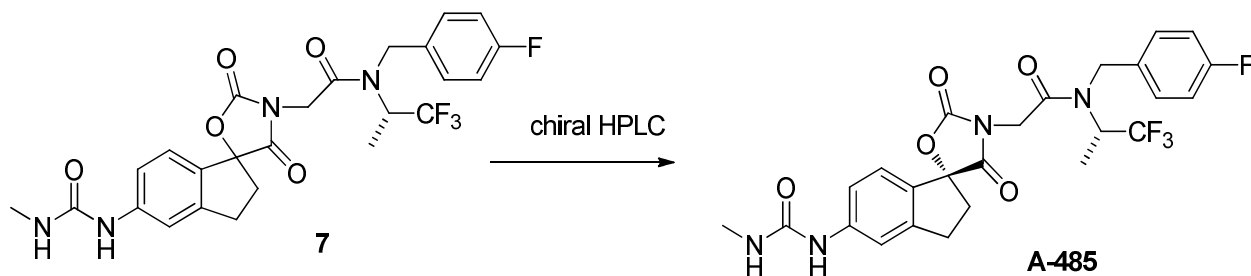

**N-(4-fluorobenzyl)-2-((R)-5-(3-methylureido)-2',4'-dioxo-2,3-dihydrospiro[indene-1,5'-ozazolidine]-3'-yl)-N-((S)-1,1,1-trifluoropropan-2-yl)acetamide – A-485:**

9 Compound **7** (2.5 g, 4.7 mmol) was purified by SFC (column: CHIRALPAK AS-H; Manufacturer: DAICEL  
10 CHIRAL TECHNOLOGIES (CHINA) CO., LTD; condition: Isopropyl alcohol /CO<sub>2</sub> (3:7)) to give compound **A-**  
11 **485** (1.01 g, 40%) as a white solid.

12 High temperature NMR resolved the rotamers seen at room temperature: <sup>1</sup>H NMR (400 MHz, DMSO-*d*<sub>6</sub>,  
13 120 °C)

14 δ 8.29 (s, 1H), 7.51 (t, *J* = 1.2 Hz, 1H), 7.36 (dd, *J* = 8.4, 5.4 Hz, 2H), 7.26 (d, *J* = 1.7 Hz, 2H), 7.15 (t, *J* = 8.7  
15 Hz, 2H), 5.87 (d, *J* = 5.4 Hz, 1H), 5.31 – 5.12 (m, 1H), 4.86 (d, *J* = 17.7 Hz, 1H), 4.74 – 4.54 (m, 2H), 4.40 (d,  
16 *J* = 16.8 Hz, 1H), 3.22 – 3.07 (m, 1H), 3.02 (ddd, *J* = 16.3, 8.7, 4.2 Hz, 1H), 2.75 – 2.61 (m, 4H), 2.50 – 2.43  
17 (m, 2H), 1.40 (d, *J* = 7.1 Hz, 3H); MS (ESI) *m/e* 1072.9 (2M+H)<sup>+</sup>; <sup>13</sup>C NMR (101 MHz, DMSO-*d*<sub>6</sub>, 120 °C) δ  
18 174.04, 167.67, 163.18, 160.75, 156.23, 154.35, 146.54, 143.73, 133.74, 130.33, 128.68, 127.38, 124.47,  
19 117.96, 115.63, 114.39, 94.60, 46.31, 42.14, 35.60, 35.56, 30.26, 26.50; HRMS (*m/z*): [M+H]<sup>+</sup> calcd for  
20 C<sub>25</sub>H<sub>25</sub>F<sub>4</sub>N<sub>4</sub>O<sub>5</sub>, 537.1756 ; found, 537.1733.

21 [α]<sub>D</sub><sup>20</sup> + 46.1° (*c* 0.74, MeOH); HPLC purity: 100% PA at 254 nm (Condition 1, Phenomenex Luna 5 μm,  
22 C18(2), 100 Å, 4.6 x 250 mm, room temperature, 1 h gradient (H<sub>2</sub>O (0.1% TFA) : Acetonitrile 10-95%  
23 gradient). HPLC purity: 99% PA at 254 nm (Condition 2, Waters XBridge 3.5 μm, C18, 4.6 x 150 mm,  
24 room temperature, 1 h gradient (H<sub>2</sub>O (0.1% H<sub>3</sub>PO<sub>4</sub>) : Acetonitrile 10-95% gradient).

25

26

27

### Synthesis of intermediate 5

1 (S)-2-bromo-N-(4-fluorobenzyl)-N-(1,1,1-trifluoropropan-2-yl)acetamide

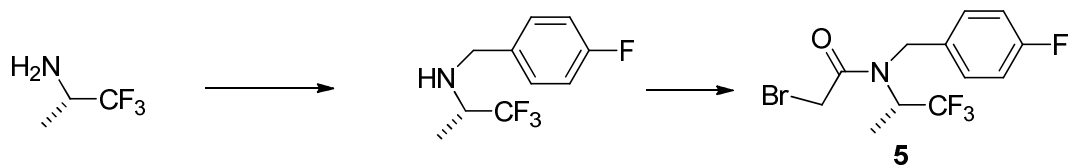

6 (S)-1,1,1-trifluoro-N-(4-fluorobenzyl)propan-2-amine:

7 To a solution of (S)-1,1,1-trifluoro-2-propanamine (37 g, 327 mmol) and 1-(bromomethyl)-4-fluorobenzene (74.3 g, 393 mmol) in DMF (500 mL) was added  $K_2CO_3$  (135 g, 981 mmol). The reaction mixture was stirred at room temperature overnight, quenched with water, extracted with EtOAc, washed with water and brine, dried and concentrated under reduced pressure. The crude product was purified by silica gel (methanol:  $CH_2Cl_2$  = 1:20) to afford (S)-1,1,1-trifluoro-N-(4-fluorobenzyl)propan-2-amine (55 g, 76%) as oil. LC-MS:  $m/z$  = 222.0  $[M+H]^+$

11 To a stirring solution of (S)-1,1,1-trifluoro-N-(4-fluorobenzyl)propan-2-amine (38.6 g, 175 mmol) in dry  $CH_2Cl_2$  (500 mL) was added 2-bromoacetyl bromide (70.4 g, 350 mmol). The resulting mixture was stirred at RT for 2 h, quenched with  $NaHCO_3$ , extracted with  $CH_2Cl_2$ , dried and concentrated and purified by silica gel (petroleum ether:ethyl acetate = 1:1) to give **5** (49.5 g, 83%) as oil. LC-MS:  $m/z$  = 342.0/344.0  $[M+H]^+$

16

17

18

### Synthesis of Compound R

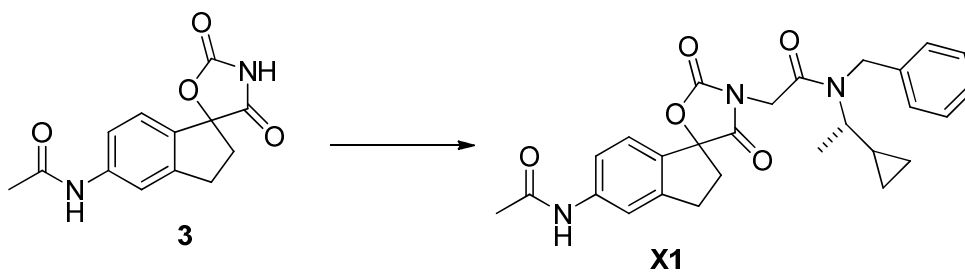

23 (S)-2-(5-acetamido-2',4'-dioxo-2,3-dihydrospiro[indene-1,5'-ozolidine]-3'-yl)-N-benzyl-N-(1-cyclopropylethyl)acetamide (X1):

24 A solution of intermediate **3** (1 g, 3.85 mmol), (S)-N-benzyl-2-bromo-N-(1-cyclopropylethyl)acetamide (1.14 g, 3.85 mmol) and  $K_2CO_3$  (1 g, 7.7 mmol) in DMF (20 mL) was stirred for 2 h. After consumption of the starting material (by TLC), the reaction mixture was diluted with sat



1 NaCl aqueous and extracted with EtOAc. Combined organic extracts were dried over anhydrous Na<sub>2</sub>SO<sub>4</sub>  
2 and concentrated under reduced pressure to obtain crude product, which was purified by silica gel  
3 column chromatography to afford compound X1 (1.35 g, 73%) as a yellow liquid. TLC: 35% Petroleum  
4 Ether/Ethyl Acetate

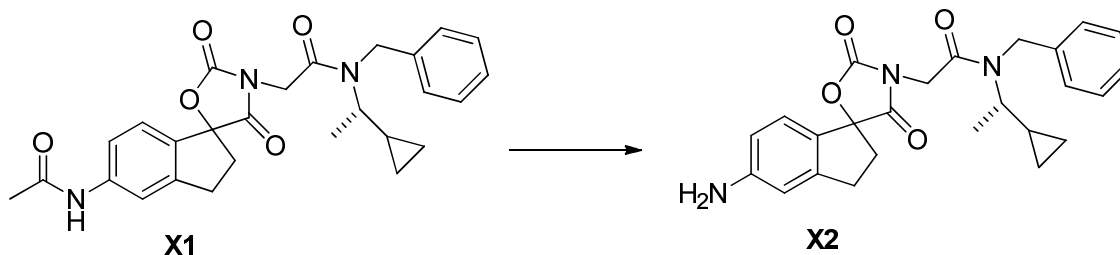

9  
10  
11  
12  
13  
14  
15  
16  
17  
18

**2-(5-amino-2',4'-dioxo-2,3-dihydrospiro[indene-1,5'-ozazolidine]-3'-yl)-N-benzyl-N-((S)-1-cyclopropylethyl)acetamide (X2):**

9 Compound **X1** (1.35 g, 2.85 mmol) was dissolved with MeOH/THF/H<sub>2</sub>O (10 mL/10 mL/10 mL),  
10 and 37% HCl (4 mL) was added. The mixture was heated to 60 degrees C and stirred for 2 hours. After  
11 consumption of compound X1 (by LC-MS), the solvent from the reaction mixture was removed under  
12 reduced pressure. The residue was diluted with sat NaCl aqueous and extracted with EtOAc. Combined  
13 organic extracts were washed with sat. Aq. NaHCO<sub>3</sub>, dried over anhydrous Na<sub>2</sub>SO<sub>4</sub> and concentrated  
14 under reduced pressure to obtain crude product, which was purified by silica gel column  
15 chromatography to afford intermediate **X2** (1 g, 81%) as a yellow liquid. TLC: 35% Petroleum Ether/Ethyl  
16 Acetate. <sup>1</sup>H NMR (400 MHz, DMSO-d<sub>6</sub>): δ 7.65 (d, J = 18.2 Hz, 1H), 7.51 – 7.08 (m, 7H), 6.56 – 6.41 (m,  
17 2H), 4.75 – 4.20 (m, 5H), 4.13 – 3.54 (m, 1H), 3.52 – 2.74 (m, 2H), 2.74 – 2.33 (m, 1H), 1.42 – 1.00 (m,  
18 3H), 1.02 – 0.84 (m, 1H), 0.56 – 0.16 (m, 4H). LC-MS: *m/z* = 434.10[M+H]<sup>+</sup> (91.53% purity, 214 nm)

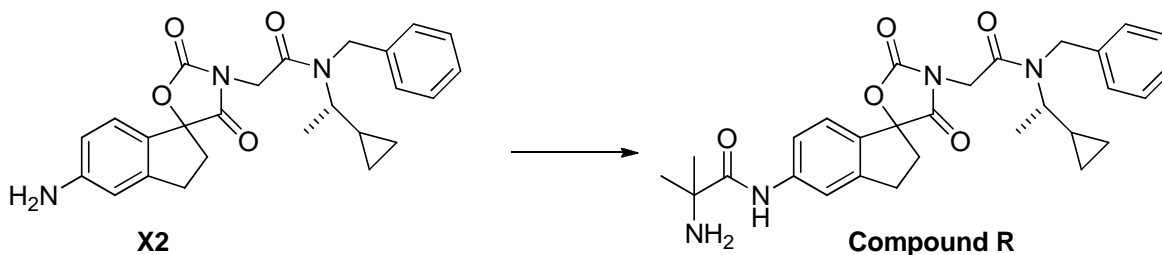

**(S)-2-amino-N-(3'-(2-(benzyl(1-cyclopropylethyl)amino)-2-oxoethyl)-2',4'-dioxo-2,3-dihydrospiro[indene-1,5'-ozazolidine]-5-yl)-2-methylpropanamide - Compound R:**

22 To a stirring solution of 2-amino-2-methylpropanoyl chloride hydrochloride salt (22 mg, 0.14 mmol) in  
23 Pyridine (0.5 mL) and CH<sub>2</sub>Cl<sub>2</sub> (0.5 ml) was added compound X2 (30 mg, 0.07 mmol) at room temperature  
24 and the reaction mixture was stirred at room temperature overnight. The mixture was then

1 concentrated and purified with Preparative-TLC( 10% MeOH/ CH<sub>2</sub>Cl<sub>2</sub>) to afford **compound R** (25 mg,  
2 69%) as white solid. TLC: 10% MeOH/ CH<sub>2</sub>Cl<sub>2</sub> (Rf: 0.2). LC-MS: *m/z* = 519[M+H]<sup>+</sup> (98% purity). <sup>1</sup>H NMR  
3 (400 MHz, CD<sub>3</sub>OD-d<sub>4</sub>) δ 7.74 (s, 1H), 7.56 – 7.23 (m, 7H), 4.84 – 4.74 (m, 2H), 4.68 – 4.55 (m, 1H), 4.45 (t,  
4 J = 4.6 Hz, 1H), 3.90-3.82 (m, 1H), 3.20-2.12 (m, 1H), 2.84 – 2.76 (m, 1H), 2.63-2.55 (m, 1H), 1.70 (d, J =  
5 2.5 Hz, 6H), 1.28 (dd, J = 21.8, 6.7 Hz, 3H), 1.03-0.9 (m, 2H), 0.68-0.53 (m, 2H), 0.40-0.25 (s, 3H). HRMS  
6 (*m/z*): [M+H]<sup>+</sup> calcd for C<sub>29</sub>H<sub>35</sub>N<sub>4</sub>O<sub>5</sub>, 519.2602 ; found, 519.2602.

7

8

9

10

11

12

13

14

15

16

17

18

19

20

21

22

### Synthesis of A-486

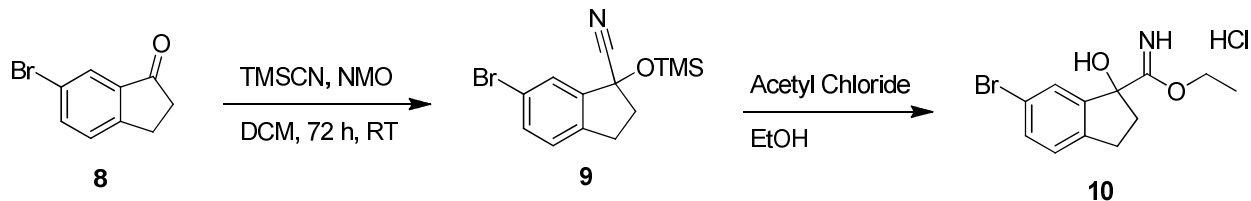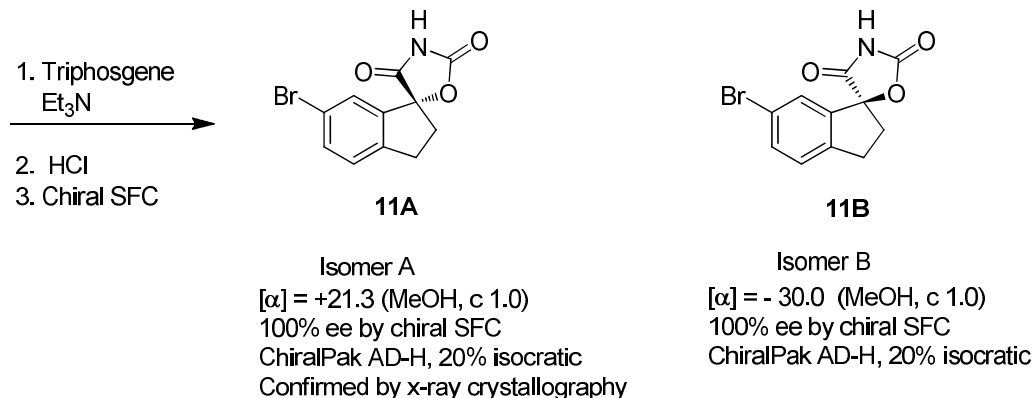

1  
2

3 6-bromo-1-((trimethylsilyl)oxy)-2,3-dihydro-1H-indene-1-carbonitrile 6-bromo-2,3-dihydro-1H-inden-1-  
4 one. (**9**)

5 (50 g, 237 mmol) of **8** was dissolved in CH<sub>2</sub>Cl<sub>2</sub> (237 ml) under nitrogen and NMO (8.33 g, 71.1 mmol) was  
6 added followed by TMS-CN (CAUTION: TOXIC, 38.1 ml, 284 mmol). The resulting black solution was  
7 stirred for 5 days. Saturated Na<sub>2</sub>CO<sub>3</sub> (aq, 200 ml) was added and the layers were separated. The  
8 aqueous layer was extracted with CH<sub>2</sub>Cl<sub>2</sub> (2x) and the combined organics were dried (anhydrous MgSO<sub>4</sub>),  
9 filtered and concentrated by rotary evaporation. The residue was purified by regular phase flash column  
10 chromatography (800 g silica gel, 0-15% Hep / EA) to give 6-bromo-1-((trimethylsilyl)oxy)-2,3-dihydro-  
11 1H-indene-1-carbonitrile (40 g, 129 mmol, 54.4 % yield) as an oil, which solidified in the freezer. <sup>1</sup>H NMR  
12 (400 MHz, DMSO-*d*<sub>6</sub>) δ 7.72 – 7.62 (m, 2H), 7.41 (dd, *J* = 7.9, 0.8 Hz, 1H), 3.17 – 2.92 (m, 2H), 2.83 (ddd, *J*  
13 = 13.1, 7.7, 5.3 Hz, 1H), 2.47 (ddd, *J* = 13.3, 7.9, 6.1 Hz, 1H), 0.26 (s, 9H).

14

15 ethyl 6-bromo-1-hydroxy-2,3-dihydro-1H-indene-1-carbamate hydrochloride (**10**)

16 6-bromo-1-((trimethylsilyl)oxy)-2,3-dihydro-1H-indene-1-carbonitrile (15 g, 48.3 mmol) was taken up in  
17 ethanol (161 ml) and cooled to 4 °C. Acetyl chloride (138 ml, 1.9 mol) was added drop-wise via addition  
18 funnel at a rate as to keep the temperature below 20 °C. The reaction was allowed to stir for 48 h upon  
19 which time it was concentrated by rotary evaporation giving a light yellow solid. The solids were

1 triturated with diethyl ether (2x) to give ethyl 6-bromo-1-hydroxy-2,3-dihydro-1H-indene-1-carbimidate  
2 hydrochloride (13.5 g, 42.1 mmol, 87%) as a white solid that was used in the next step without further  
3 purification.

4

5 **(Compounds 11A and 11B).** (R)-6-bromo-2,3-dihydrospiro[indene-1,5'-oxazolidine]-2',4'-dione and (S)-  
6 6-bromo-2,3-dihydrospiro[indene-1,5'-oxazolidine]-2',4'-dione.

7

8 A 500 ml flask was charged with ethyl 6-bromo-1-hydroxy-2,3-dihydro-1H-indene-1-carbimidate  
9 hydrochloride (12.52 g, 39.1 mmol) and tetrahydrofuran (150 ml). To the resulting suspension was  
10 added triethylamine (16.33 ml, 117 mmol) and the solution was cooled in an ice bath to 2 °C. The  
11 bis(trichloromethyl) carbonate (4.64 g, 15.62 mmol) [CAUTION: WEIGH THE TRIPHOSGENE IN BALANCE  
12 ENCLOSURE. VERY TOXIC CHEMICAL] was then added portionwise over 17 min [CAUTION: THE  
13 TRIPHOSGENE ADDITION IS STRONGLY EXOTHERMIC] keeping the temperature below 15 °C. After 1 h,  
14 the reaction was complete and was cooled back down to 5 °C and carefully diluted portion-wise with 2N  
15 aqueous HCl (100 ml). This was initially very exothermic as the mixture got very thick. Stirring was  
16 increased and as more acid was added, the solid finally dissolved. As the temperature dropped back to  
17 15 °C, the bath was removed and the mixture was stirred for 30 min and then extracted with ethyl  
18 acetate (2x). The combined organics were dried over anhydrous Na<sub>2</sub>SO<sub>4</sub>, filtered and concentrated by  
19 rotary evaporation. The residue was purified by regular phase flash column chromatography  
20 (CombiFlash RF, silica gel Gold Rf cartridge (220 g) eluted with a 10 - 50 % ethyl acetate in heptanes  
21 gradient) to give racemic 6-bromo-2,3-dihydrospiro[indene-1,5'-oxazolidine]-2',4'-dione (10.9 g, 39.2  
22 mmol, 70%). The enantiomers were separated by chiral SFC (ChiralPak AD-H, 20% isocratic) providing  
23 (R)-6-bromo-2,3-dihydrospiro[indene-1,5'-oxazolidine]-2',4'-dione as a single enantiomer (3.9 g, 13.8  
24 mmol, 35.4%) as a white solid. 100% ee determined by Chiral SFC (ChiralPak AD-H, 20% MeOH  
25 isocratic);  $[\alpha]_D^{23} = +21.3$  (c 1.0, MeOH); <sup>1</sup>H NMR (501 MHz, DMSO-*d*<sub>6</sub>) δ 12.18 (s, 1H), 7.71 (d, *J* = 1.9 Hz,  
26 1H), 7.61 (dd, *J* = 8.1, 1.9 Hz, 1H), 7.44 – 7.28 (m, 1H), 3.14 – 3.02 (m, 1H), 3.02 – 2.90 (m, 1H), 2.66 (ddd,  
27 *J* = 14.4, 8.5, 5.9 Hz, 1H), 2.59 – 2.39 (m, 2H). **The structure of the R enantiomer was determined by x-**  
28 **ray crystallography.** (S)-6-bromo-2,3-dihydrospiro[indene-1,5'-oxazolidine]-2',4'-dione as a single  
29 enantiomer (3.9 g, 13.8 mmol, 35.4%) as a white solid. 100% ee determined by Chiral SFC (ChiralPak AD-  
30 H, 20% MeOH isocratic);  $[\alpha]_D^{23} = -30.0$  (c 1.0, MeOH); <sup>1</sup>H NMR (501 MHz, DMSO-*d*<sub>6</sub>) δ 12.18 (s, 1H), 7.71

1 (d,  $J = 1.9$  Hz, 1H), 7.61 (dd,  $J = 8.1, 1.9$  Hz, 1H), 7.44 – 7.28 (m, 1H), 3.14 – 3.02 (m, 1H), 3.02 – 2.90 (m,  
2 1H), 2.66 (ddd,  $J = 14.4, 8.5, 5.9$  Hz, 1H), 2.59 – 2.39 (m, 2H).

3

4

5

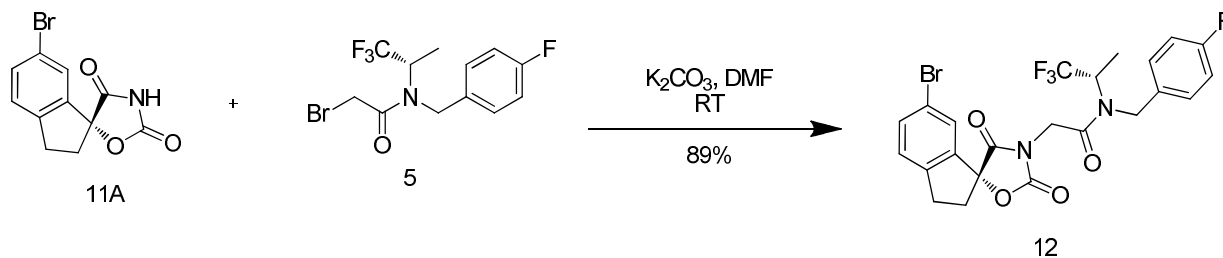

7 (R)-6-bromo-2,3-dihydrospiro[indene-1,5'-oxazolidine]-2',4'-dione (**11A**) (0.705 g, 2.5 mmol), (S)-2-  
8 bromo-N-(4-fluorobenzyl)-N-(1,1,1-trifluoropropan-2-yl)acetamide (0.855 g, 2.500 mmol) (**5**) and  
9 potassium carbonate (0.691 g, 5.00 mmol) were combined in DMF (12.50 ml) and the mixture was  
10 stirred at RT for 4 hours. At this time LCMS indicates no remaining isoxazolidinedione starting material.  
11 The reaction mixture was diluted with water (50 mL) and extracted with EtOAc (3 x 30 mL). Extracts  
12 were dried ( $\text{Na}_2\text{SO}_4$ ) and concentrated then purified by flash chromatography (gradient from 0 to 30%  
13 EA) to give the product **12** (1.215 g, 89%) as a white solid.  $^1\text{H}$  NMR (400 MHz,  $\text{DMSO}-d_6$ ,  $T = 90^\circ\text{C}$ )  $\delta$  7.62  
14 (d,  $J = 1.9$  Hz, 1H), 7.58 (dd,  $J = 8.1, 1.9$  Hz, 1H), 7.35 (d,  $J = 8.3$  Hz, 1H), 7.36-7.28 (br s, 2 H), 7.13 (br t,  $J =$   
15 7.6 Hz, 2H), 5.20 (br s, 1H), 4.83 (d,  $J = 17.6$  Hz, 1H), 4.62 (br s, 2H), 4.35 (br s, 1H), 3.19 – 3.07 (m, 2H),  
16 2.71 – 2.63 (m, 1H), 2.55 – 2.48 (m, 1H), 1.36 (d,  $J = 7.0$  Hz, 3H). MS (ESI+)  $m/z$  565.0 ( $\text{M}+\text{Na}^+$ )

17

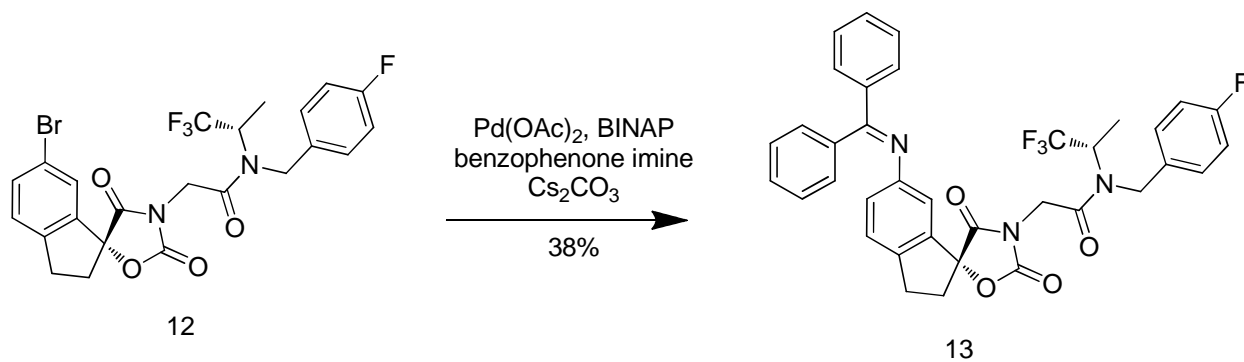

1 A flask was charged with 2-((R)-6-bromo-2',4'-dioxo-2,3-dihydrospiro[indene-1,5'-oxazolidin]-3'-yl)-N-(4-  
2 fluorobenzyl)-N-((S)-1,1,1-trifluoropropan-2-yl)acetamide (1.2 g, 2.21 mmol) and then degassed under a  
3 stream of nitrogen for 30 min. Toluene (12 ml, from a fresh Sure-Seal™ bottle) and  
4 diphenylmethanimine (0.560 g, 3.09 mmol) were added to the solids via syringe and the degassing was  
5 continued for another 10 min. Separately, diacetoxypalladium (0.020 g, 0.088 mmol), BINAP (0.124 g,  
6 0.199 mmol) and cesium carbonate (1.007 g, 3.09 mmol) were placed into a dried, nitrogen-flushed 3-  
7 neck flask equipped with a condenser and degassed under a stream of nitrogen for 40 min. Toluene (8  
8 ml) was added and the mixture was stirred for 10 min. The bromide solution from above was added to  
9 the palladium catalyst suspension via syringe and the resulting mixture was heated to 100 °C overnight.  
10 The color changed from orange to deep red to gold as the reaction progressed. The reaction mixture  
11 was cooled to RT and then passed through a membrane filter and directly loaded onto a column. The  
12 product was purified by flash chromatography (gradient from 0 to 60% EA-heptane) to give the product  
13 **13** (541 mg, 38%) as a light yellow foam. <sup>1</sup>H NMR (400 MHz, DMSO-*d*<sub>6</sub>, T = 90 °C) δ 7.60-7.56 (br m, 2H),  
14 7.50-7.18 (br m, 8H), 7.17-6.99, (br m, 4H), 7.12 (d, *J* = 8.0 Hz, 1H), 6.77 (d, *J* = 1.9 Hz, 1H), 6.72 (dd, *J* =  
15 8.1, 2.0 Hz, 1H), 5.19 (br s, 1H), 4.82 (d, *J* = 17.5 Hz, 1H), 4.60 (br s, 2H), 4.33 (br s, 1H), 3.03 (dt, *J* = 15.3,  
16 7.4 Hz, 1H), 2.91 (ddt, *J* = 12.9, 8.6, 4.4 Hz, 1H), 2.60 (ddd, *J* = 14.9, 8.7, 6.4 Hz, 1H), 2.41 (ddd, *J* = 14.5,  
17 8.3, 4.3 Hz, 1H), 1.37 – 1.33 (d, *J* = 7.1 Hz, 2H). MS (ESI+) *m/z* 644.2 (M+H)<sup>+</sup>

18

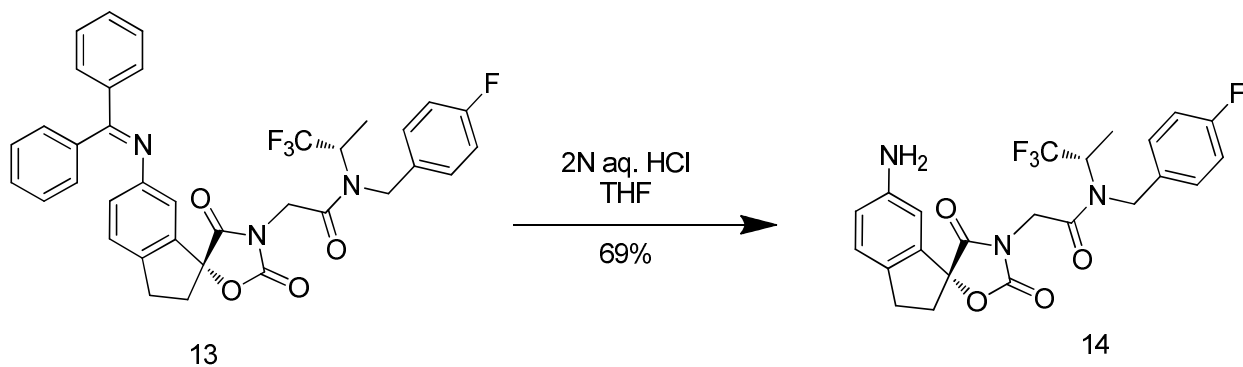

21 2-((R)-6-((diphenylmethylene)amino)-2',4'-dioxo-2,3-dihydrospiro[indene-1,5'-oxazolidin]-3'-yl)-N-(4-  
22 fluorobenzyl)-N-((S)-1,1,1-trifluoropropan-2-yl)acetamide (541 mg, 0.841 mmol) was dissolved in THF ( 8  
23 ml) and 2N aq. HCl (3 ml, 6.00 mmol) was added. The reaction was stirred for 30 min at RT, at which  
24 time TLC (50% EA-heptane) indicates completion. The reaction mixture was diluted with sat NaHCO<sub>3</sub> (70

1 mL) and stirred for 30 min then extracted with EtOAc (3 x 30 mL). Extracts were dried (Na<sub>2</sub>SO<sub>4</sub>) and  
2 concentrated then purified by flash chrom (gradient from 0 to 60% EA) to give 280 mg (69%) of the  
3 product **14**, a white solid. <sup>1</sup>H NMR (400 MHz, DMSO-*d*<sub>6</sub>, T = 120 °C), δ 7.33 (dd, *J* = 8.5, 5.5 Hz, 2H), 7.12  
4 (t, *J* = 8.8 Hz, 2H), 7.01 (d, *J* = 8.1 Hz, 1H), 6.68 (dd, *J* = 8.1, 2.2 Hz, 1H), 6.55 (d, *J* = 2.1 Hz, 1H), 5.19 (d, *J* =  
5 8.9 Hz, 1H), 4.83 (d, *J* = 17.6 Hz, 1H), 4.71 (s, 2H), 4.65 – 4.54 (m, 2H), 4.35 (d, *J* = 16.8 Hz, 1H), 3.03 –  
6 2.94 (m, 1H), 2.89 (td, *J* = 7.8, 7.2, 4.8 Hz, 1H), 2.61 (ddd, *J* = 14.3, 8.4, 5.9 Hz, 1H), 2.40 (ddd, *J* = 14.2,  
7 8.3, 4.8 Hz, 1H), 1.36 (d, *J* = 7.0 Hz, 3H). MS (ESI-) *m/z* 478.1 (M-H)<sup>-</sup>

8  
9

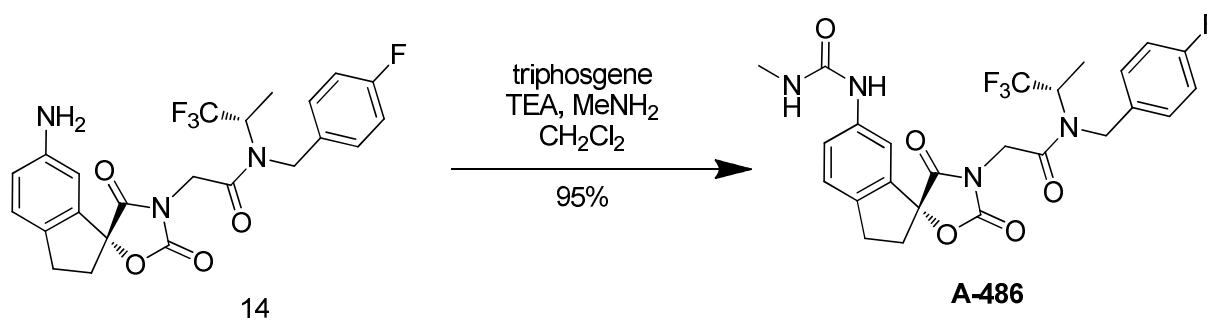

12 2-((R)-6-amino-2',4'-dioxo-2,3-dihydrospiro[indene-1,5'-oxazolidin]-3'-yl)-N-(4-fluorobenzyl)-N-((S)-1,1,1-  
13 trifluoropropan-2-yl)acetamide (**14**) (0.28 g, 0.584 mmol) was dissolved in CH<sub>2</sub>Cl<sub>2</sub> (8.34 ml).  
14 Triethylamine (0.244 ml, 1.75 mmol) was added, and then the solution was chilled in an ice-water bath  
15 to 0 °C and triphosgene (0.069 g, 0.234 mmol) was added in a single portion. The reaction was stirred for  
16 2 hr at 0 °C and then methylamine, 2N in THF (0.876 ml, 1.75 mmol) was added. The cooling bath was  
17 removed and the reaction was stirred overnight at RT.

18  
19 The reaction mixture was diluted with 1N HCl (10 mL). The layers were separated and the aqueous layer  
20 was extracted with CH<sub>2</sub>Cl<sub>2</sub> (2 x 10 mL). Extracts were dried (Na<sub>2</sub>SO<sub>4</sub>) and concentrated then purified by  
21 flash chromatography (gradient from 0 to 80% EA-heptane) to give the product **A-486** (297 mg, 95%). <sup>1</sup>H  
22 NMR (400 MHz, DMSO-*d*<sub>6</sub>) δ 8.14 (s, 1H), 7.46 (dd, *J* = 8.3, 2.1 Hz, 1H), 7.36 – 7.29 (m, 3H), 7.21 (d, *J* = 8.3  
23 Hz, 1H), 7.12 (t, *J* = 8.8 Hz, 2H), 5.75 (s, 1H), 5.24 – 5.13 (m, 1H), 4.83 (d, *J* = 17.6 Hz, 1H), 4.61 (d, *J* = 18.1  
24 Hz, 2H), 4.37 (d, *J* = 16.8 Hz, 1H), 3.11 – 2.92 (m, 2H), 2.72 – 2.64 (m, 1H), 2.63 (d, *J* = 4.7 Hz, 3H), 2.50 –

1 2.42 (m, 1H), 1.36 (d,  $J = 7.1$  Hz, 3H). MS (ESI+)  $m/z$  537.1 (M+H)<sup>+</sup>. <sup>13</sup>C NMR (126 MHz, DMSO-d<sub>6</sub>)  $\delta$   
2 173.79, 167.53, 161.97 (d,  $J = 243.5$  Hz), 156.37, 154.33, 140.72, 138.09, 137.94, 133.78, 128.73 (d,  $J =$   
3 8.1 Hz), 125.99 (q,  $J = 284.2$  Hz), 125.49, 121.99, 115.66 (d,  $J = 21.6$  Hz), 113.73, 94.56, 52.57 – 51.69 (m),  
4 46.24, 42.21, 35.98, 29.47, 26.52, 11.97. HRMS ( $m/z$ ): [M+H]<sup>+</sup> calcd for C<sub>25</sub>H<sub>25</sub>F<sub>4</sub>N<sub>4</sub>O<sub>5</sub>, 537.1756 ; found,  
5 537.1766.  
6  
7



## 1 **Online Methods**

### 2 **Chemicals and Antibodies**

3 A-485, A-486, and Compound R were synthesized at AbbVie. Enzalutamide was from SelleckChem (#  
4 S1250). Antibodies used in this study are listed in **Supplementary Table 14**.

5

### 6 **Radiometric SPA Histone acetyltransferase activity assay**

7 Reactions were performed in a 40  $\mu$ L volume in polypropylene 96 well 300  $\mu$ L plates (Greiner) in reaction  
8 buffer (100 mM HEPES buffer; pH 7.9, 80  $\mu$ M EDTA, 40  $\mu$ g/mL BSA, 100 mM KCl, 1 mM DTT, 0.01%  
9 triton X-100 and 5% DMSO). The test compounds were dissolved in DMSO to generate 10 mM stocks  
10 and further diluted with 10mM HEPES, pH 7.8 with 20% DMSO to make 4X intermediate concentrations.  
11 Compounds were tested from 120  $\mu$ M to 2 nM in 3-fold dilutions. 10  $\mu$ L of the compound stock was  
12 added to 20  $\mu$ L of p300 HAT domain enzyme at 10 nM (2x of final concentration) and incubated at room  
13 temperature for 30 minutes. The reaction was initiated by adding 10  $\mu$ L of a 4X substrate mix consisting  
14 of a biotinylated synthetic Histone H4 Peptide (Biotin-C6-GRGKGGKGLGKGGAK) at 100  $\mu$ M, 1.8  $\mu$ M cold  
15 acetyl coenzyme A (Moravek) and 0.6  $\mu$ M tritiated acetyl coenzyme A (Sigma). The reaction was  
16 incubated for one hour at room temperature and terminated with the addition of 160  $\mu$ L of 0.5 N HCl.  
17 The reaction contents were then transferred to a 96 well streptavidin and scintillant-coated microplate  
18 (Perkin Elmer), incubated for 1 hour, and counted in TopCount (Perkin Elmer) microplate scintillation  
19 counter at one minute per well. IC<sub>50</sub> values were generated based on percent inhibition calculated from  
20 the scintillation counter readings using Prism GraphPad 5.

21

### 22 **p300-BHC and CBP-BHC domain expression and purification**

23 p300-BHC domain (residues 1036-1822) and CBP-BHC domain (residues 1072-1859) were synthesized by  
24 GenScript with N-terminal 6His-Flag tag and cloned into pFastBac vector. The protein was expressed in

1 Sf9 cells using the Bac-to-Bac baculovirus system (Invitrogen). Proteins were lysed and purified by FLAG  
2 chromatography using 20 mM Tris (pH 8.0), 150 mM KCl, 10% glycerol and 2mM EDTA. SigmaFast  
3 protease cocktail S8830 (EDTA free) was used during cell lysis on a French Pressure cell. After elution,  
4 FLAG peptide was removed by extensive dialysis against buffer also containing 1mM TCEP. To  
5 understand the EDTA impact on biochemical activity assay, another preparation of p300 BHC domain  
6 was generated under the same conditions, but omitting EDTA throughout the preparation.

7

### 8 **p300 and CBP biochemical activity assay**

9 Acetyltransferase activity assays for p300-BHC and CBP-BHC domains were performed by detecting the  
10 acetylation of Lysine residues of a histone H4 synthetic-peptide using a TR-FRET assay. Reactions were  
11 performed in a 10  $\mu$ L volume using an assay buffer containing 100 mM HEPES; pH 7.9, 80  $\mu$ M EDTA, 40  
12  $\mu$ g/mL BSA, 100 mM KCl, 1 mM DTT, 0.01% triton X-100. Given the use of EDTA in this assay, it is  
13 possible that the structural integrity of the BHC protein used could be affected due to the presence of  
14 multiple Zinc containing domains (C/H3, PHD, and RING) in this protein. Thus, the p300-BHC activity  
15 assay was also performed with p300-BHC purified in the complete absence of EDTA and in assay buffer  
16 in the absence of EDTA. Each compound of interest was dissolved in DMSO and dispensed at 50 nL by a  
17 Labcyte Echo (Labcyte, Sunnyvale, CA) into white 384 well low- volume plates (Perkin Elmer 6008289) in  
18 3-fold dilutions from 50  $\mu$ M to 0.00075  $\mu$ M. p300-BHC or CBP-BHC protein at 0.6 nM was pre-incubated  
19 with A-485 or A-486 for 30 minutes. The reaction was initiated by adding 5  $\mu$ L of a biotinylated synthetic  
20 Histone-H4 peptide (Anaspec AS-65097) at 2  $\mu$ M and acetyl coenzyme A (Sigma-Aldrich A2056) at 0.5  
21  $\mu$ M. Following incubation for 1 hour at room temperature in a humidified chamber, the reaction was  
22 terminated with 10  $\mu$ L of 3 nM LANCE Ultra Europium-anti-acetyl-Histone H4 Lysine antibody (Perkin  
23 Elmer TRF0412-D), 900 nM LANCE Ultra ULight-Streptavidin (Perkin Elmer TRF0102-D) in LANCE  
24 Detection Buffer (PerkinElmer CR97-100). TR-FRET measurements were obtained using a Perkin Elmer

1 Envision with laser excitation at 335 nm and emission at 665 nm and 620 nm. For acetyl-CoA  
2 competition experiments, the assay was run as above except the acetyl-CoA concentration was varied  
3 from 0.078 to 10  $\mu$ M. IC<sub>50</sub> values for inhibition were calculated using a sigmoidal fit of the  
4 concentration/inhibition response curves using Prism GraphPad 5.

5

### 6 **p300 AlphaLISA Peptide Binding Assay**

7 Binding of P300-BHC to a histone H4 synthetic-peptide was assessed using AlphaLISA (Perkin Elmer)  
8 technology. Assays were performed in a 40  $\mu$ L volume in white 384 well assay plates (Perkin Elmer  
9 6007290) with an assay buffer containing 100 mM HEPES, pH 7.9, 80  $\mu$ M EDTA, 40 $\mu$ g/mL BSA, 100 mM  
10 KCl, 1 mM DTT, 0.01% triton X-100. Ten  $\mu$ L of a biotin-labeled H4 peptide (Anaspec AS-65097) was added  
11 to 10  $\mu$ L of P300-BHC (for a final concentration of 15 nM and 115 nM respectively) and incubated for  
12 one hour at room temperature. To demonstrate a decrease in AlphaLISA signal by competing with the  
13 biotin-labeled peptide, a 10  $\mu$ L 2-fold mix of an unlabeled H4 peptide (Anaspec AS-62499) and biotin  
14 labeled H4 peptide (final concentration of 300  $\mu$ M and 115 nM respectively) was added to 20  $\mu$ L of  
15 P300-BHC (final concentration of 15nM) and incubated for 1 hour at room temperature. 20  $\mu$ L of a 2-  
16 fold mix containing Nickel- chelate AlphaLISA acceptor beads (Perkin Elmer AL108) and AlphaScreen  
17 streptavidin donor beads (Perkin Elmer 6760002) was added (final concentration of 20  $\mu$ g/mL each) to  
18 the enzyme-peptide complex and incubated at room temperature for 1.5 hours. AlphaLISA counts were  
19 obtained using a Perkin Elmer Envision with laser excitation at 680 nm and emission at 615 nm.

20

### 21 **Thermal shift assay**

22 Thermal shift assays were performed on the Roche LightCycler 480 instrument using p300-BHC purified  
23 with EDTA in the lysis buffer (above). Sypro Orange dye was purchased from Invitrogen as 5000X stock.  
24 The assay was performed in 20mM HEPES, pH 7.5, 50mM NaCl, 1mM TCEP, 2% DMSO, and 1:500

1 dilution of the dye at a protein concentration of 1.5  $\mu$ M. 50x stock DMSO samples of Lys CoA, (CPC  
2 Scientific, CA) and A-485 were prepared so the final DMSO concentration was 2%, (v/v). All samples  
3 were run in quadruplicate.

4

5  **$\Delta$ p300 HAT domain protein expression and purification for Surface Plasmon Resonance (SPR) and X-**  
6 **ray crystallography**

7  $\Delta$ p300 HAT domain protein construct (residues 1287 to 1652 with internal loop deletion of amino acids  
8 1523-1554 plus K1637R and M1652G mutations fused to Vent Intein chitin binding domain) was  
9 expressed in E. coli BL21-CodonPlus(DE3)-RIL cells and purified on Chitin resin (New England Biolabs,  
10 Ipswich, MA) following the previously described protocol <sup>1</sup> with minor modifications. To make the final  
11 HAT domain (1287-1666) and compound complex, compound was added to a final 100  $\mu$ M during the  
12 ligation step with the C-terminal 14-mer peptide (CMLVELHTQSQDRF). Ligation was done in the absence  
13 of air on a rocker at 21°C overnight. The next morning the ligated protein was eluted from the chitin  
14 column and dialyzed into a buffer containing 20 mM HEPES (pH 7.2), 50 mM NaCl, and 1 mM TCEP. The  
15 protein complex was further purified using a Tosoh SP5PW (2X15cm) column. Elution was achieved with  
16 buffer 20 mM Tris (pH 8.0), 400 mM NaCl, and 1 mM TCEP over 7.5 column volumes. 20  $\mu$ M compound  
17 was added to the eluted protein pool. The protein was then dialyzed overnight into the buffer  
18 containing 20 mM HEPES (pH7.2), 50 mM NaCl, 1 mM TCEP, and 20  $\mu$ M compound and concentrated to  
19 8.4 mg/ml for X-ray. For surface plasmon resonance (SPR) studies, 14mer peptide plus the Avi-tag  
20 (CMLVELHTQSQDRFGGSGGLNDIFEAQKIEWHW) was used for the ligation with  $\Delta$ p300 HAT (1287-1652)-  
21 Vent Intein chitin binding domain protein to make the  $\Delta$ p300 HAT (1287-1666)-Avi tagged protein.

22

23

24

## 1 **Surface Plasmon Resonance (SPR)**

2 The binding kinetics of compounds to p300-HAT domain protein were determined by surface plasmon  
3 resonance-based measurements made on Biacore T200 instruments (GE Healthcare) at 25 °C using a  
4 biotin-neutravidin capture assay approach. The recombinant domains of human p300-HAT were  
5 expressed as described above and enzymatically biotinylated with BirA using the BIR-A kit from Avidity  
6 Technologies, (Aurora, CO) per the manufacturer's instructions. For neutravidin chip preparation  
7 running buffer was buffer HBS-EP+ (10 mM Hepes, pH7.4, 150 mM NaCl, 3 mM EDTA, 0.05% Tween 20;  
8 GE Healthcare, cat # BR-1006-69). NeutrAvidin Protein (Thermo Fisher Scientific Inc., cat # 31000) was  
9 diluted to 12.5 µg/mL in 10 mM sodium acetate (pH 5.5) and directly immobilized across a CM5  
10 biosensor chip (GE Healthcare, cat#29-1496-03) using standard amine coupling procedures to a level of  
11 approximately 7,000 RU. For test surface preparation, biotinylated p300 protein was captured by  
12 neutravidin in running buffer containing 1 mM TCEP to approximately 3000RU; neutravidin only surfaces  
13 served as primary reference, all surfaces were then blocked by injection of free biotin. Binding kinetic  
14 measurements were made in the assay buffer HBS-EP+ containing 1mM TCEP, 3% DMSO. A-485 was  
15 assayed in single-cycle kinetics mode wherein each assay cycle consisted of the following: five  
16 consecutive analyte injections (either a 5 point, 4-fold increasing compound concentration series ending  
17 at 6µM top dose or a buffer only series) over both reference and test surface, 60 s at 80 µL/min, after  
18 which the dissociation was monitored for 600 seconds at 80 µL/min. Washout cycles were included  
19 between each compound series. A-486 was assayed in consecutive cycle mode for an 11point, 2-fold  
20 concentration series ending at 100 µM top dose and buffer only wherein the assay consisted of 30 s  
21 association phase followed by a 30 s dissociation phase at 80 µL/min. During the assay, all  
22 measurements were referenced against the capture surface alone (i.e. neutravidin with no captured  
23 p300) and buffer-only injections were used for double referencing. DMSO correction cycles were  
24 included to correct for minor DMSO differences and excluded volume effects. Data were processed and

1 fitted globally to a 1:1 binding model using Biacore T200 Evaluation software to determine the binding  
2 kinetic rate constants,  $k_a$  ( $M^{-1}s^{-1}$ ) and  $k_d$  ( $s^{-1}$ ), and the equilibrium dissociation constant  $K_D$  (M) or steady-  
3 state binding levels were fitted to determine the equilibrium dissociation constant  $K_D$  (M) alone.

## 4 5 **Crystallography**

6 Crystals were obtained using the vapor diffusion method with a 1:1 mixture of crystallization reagents  
7 (25% (w/v) PEG3,350, 0.2M Sodium Chloride, 0.1M BIS-Tris buffer pH 5.5) and  $\Delta p300/A-485$  complex  
8 sample mentioned above. Needle crystals initially formed after incubating the crystallization plates at  
9 17 °C overnight. Later, thin plate crystals appeared on top of needle crystals which grew to their full size  
10 within one week. These plate crystals were separated from the needles and flash frozen into liquid  
11 nitrogen using the reservoir solution plus 20% glycerol as the cryo-protectant. Diffraction data were  
12 collected to 1.95Å using beamline 17ID at the Advanced Photon Source at 1.000 Å and 100K. Data were  
13 reduced and scaled with autoPROC<sup>2</sup> software having a completeness of 100% and Rmerge=0.058. The  
14 crystal belongs to spacegroup C222<sub>1</sub> with unit cell dimensions a=45.19, b=102.94, c=168.44,  $\alpha=\beta=\gamma=90^\circ$ .  
15 The structure was solved by molecular replacement using 3BIY as the search model with the program  
16 Phaser.<sup>3</sup> The dictionary for the ligand was generated using the program AFITT<sup>4</sup>. Iterative rounds of map  
17 fitting and refinement were performed using the programs Coot<sup>5</sup> and either Refmac<sup>6</sup> or Buster.<sup>7</sup>  
18 Analysis of the structure showed that 99% of the residues are in the preferred or allowed portions of the  
19 Ramachandran diagram. Data collection and refinement statistics are shown in **Extended Data Fig. 2**.

## 20 21 **Cell Culture**

22 Cell lines were obtained from the vendors as detailed in **Supplementary Table 10**. The cells were tested  
23 for mycoplasma using MycoAlert Detection Kit (Lonza, Walkersville, MD), authenticated using GenePrint  
24 10 STR Authentication Kit (Promega, Madison, WI), and grown in media as recommended by the

1 supplier. For DHT stimulation, LnCaP-FGC cells were starved of androgens in phenol red free media  
2 containing 10% charcoal stripped FBS (ThermoFisher cat # 12676-029) for 72 h, treated with 5-fold  
3 dilutions of A-485 or enzalutamide (Enz) starting at 10  $\mu$ M for 30 min, and then further treated with 5  
4 nM DHT for the indicated times. VCaP Cells were starved of androgens for 24 h and then treated as  
5 above except that 1 nM DHT was added. 22Rv1 cells were starved of androgens for 72 h as per LnCap-  
6 FGC cells and treated as above in the absence of DHT via adding only the ethanol diluent.

7

### 8 **High Content Microscopy**

9 U2OS and PC-3 cells were plated in Collagen I coated 96-well view plates (Perkin Elmer Cat #: 6005810)  
10 while LnCaP-FGC cells were plated in uncoated plates (Perkin Elmer Cat #: 6005810) overnight. Cells  
11 were then treated with an 8 point half-log dose response of A-485 or A-486 starting at 10  $\mu$ M for the  
12 indicated times. Cells were fixed in 10% formaldehyde (Polysciences, Inc. #04018) at room temperature  
13 for 10 min, washed in PBS, and then permeablized in 0.1% Triton X-100 for 10 min. Cells were then  
14 blocked in 1% BSA for 1 h and incubated with the incubated antibodies in antibody dilution buffer (0.3%  
15 BSA in PBS) overnight at 4 °C. Cells were washed three times in PBS and then incubated with a mixture  
16 of Alexa Fluor488-conjugated goat anti-rabbit IgG antibodies (Life Technologies, #A-11029), Alexa  
17 Fluor555-conjugated goat anti-mouse IgG (Life Technologies, #A-21424) antibodies, and Hoechst 33342  
18 (Life Technologies, #H3570) for 1 h at room temperature. After washing four times in PBS, plates were  
19 scanned within 24 h of processing on a ThermoFisher CellInsight using the target activation algorithm  
20 acquiring 15 fields per well. Fluorescence intensities were quantified using the average mean intensity  
21 function. EC<sub>50</sub> values for H3K27Ac, H3K18Ac, and H3K9Ac inhibition were calculated using a sigmoidal fit  
22 of the concentration/inhibition response curves using Prism GraphPad 5.

23

24

1 **Analysis of CBP/p300 acetylation**

2 HeLa cells were SILAC labeled with heavy isotopes of arginine and lysine (<sup>13</sup>C6, <sup>15</sup>N4-arginine and  
3 <sup>13</sup>C6, <sup>15</sup>N2-lysine, Cambridge Isotope Laboratories). The cells were treated with A-485 (10 μm) or vehicle  
4 control for 16 hours. Cell were lysed in ice-cold lysis buffer [50mM Hepes, pH7.5, 150mM NaCl, 1mM  
5 EDTA, 1% NP-40, 0.1% sodium deoxycholate, 1x complete protease inhibitor cocktail (Roche)]. Proteins  
6 were proteolyzed with trypsin, and acetylated peptides were analyzed as described previously<sup>8</sup>. Briefly,  
7 the peptide samples were analyzed by online nanoflow liquid chromatography coupled tandem mass  
8 spectrometry (LC-MS/MS) using a Proxeon easy nLC system connected to a Q-Exactive HF mass  
9 spectrometer (Thermo Scientific), as reported previously<sup>9</sup>. The raw data was computationally processed  
10 using MaxQuant<sup>10</sup> and searched against the UniProt database (downloaded July 6, 2015) using the  
11 integrated Andromeda search engine (<http://www.maxquant.org/>).

12

13

14 **RNA isolation and quantitative reverse transcription PCR (qRT-PCR)**

15 Cells were treated with compounds in 96 well plates for the indicated times and then washed once in  
16 PBS. Plates were then sealed and put at -80 °C for 24 h. RNA was then isolated via the 96 well RNA spin  
17 kit (GE Health 25-0500-75) according to manufacturer's instructions. cDNA was generated using the  
18 Superscript III First-Strand Synthesis SuperMix (Thermo Fisher 18080-400) according to manufacturer's  
19 instructions. Samples were then run on a Bio-Rad CFX384 machine using Taqman supermix (Applied  
20 Biosciences 4427788), cDNA, and Primetime PCR assays (Integrated DNA Technologies, IDT) for the  
21 indicated genes (probes listed in **Supplementary Table 15**). Data analysis was performed using Bio-Rad  
22 CFX 3.1 Manager and further processed via Prism GraphPad 5. IC<sub>50</sub> values for inhibition of gene  
23 expression were calculated using a sigmoidal fit of the concentration/inhibition response.

24



## 1 **Cell Proliferation assay**

2 Cell lines were plated in 96 well or 384 well plates and allowed to adhere for 24 h. The cells were then  
3 treated with compounds for 3, 4, or 5 days. Experiments were run in triplicate and the fraction of viable  
4 cells was determined using the CellTiter-Glo Luminescent Cell Viability Assay (Promega, #G7572)  
5 according to the manufacturer's recommendations. The plates were read in a Perkin Elmer Envision  
6 using a Luminescence protocol with a 0.5 second integration time. To generate dose response curves,  
7 the data was normalized to percent cellular viability by setting the average of the staurosporine and  
8 DMSO control wells to 0% and 100% viability respectively. The replicate values for each dilution point  
9 were averaged and the EC<sub>50</sub> values for each compound generated in Prism GraphPad 5 by fitting  
10 normalized data to a sigmoidal curve model of linear regression. For Thymidine incorporation assays,  
11 cells were treated with compounds for 1, 2, 3, or 4 days. Twenty four hours prior to the time point,  
12 tritiated thymidine was added and cells were incubated for an additional 24 h. Genomic DNA was then  
13 isolated on filter plates using Cell Harvester (PerkinElmer). Filter plates were oven dried at 37 °C  
14 overnight and then sealed on the bottom. Econscent scintillation fluid (40 µl) was added and the plates  
15 were then sealed over the top and counted in a TopCount (Perkin Elmer) microplate scintillation  
16 counter.

17

## 18 **Western Blotting**

19 Cells were lysed in ice cold cell lysis buffer [Cell Lytic M, Sigma #C2978 supplemented with protease  
20 inhibitors (Roche #11836153001), phosphatase inhibitors (Roche #04906837001) and benzonase  
21 (EMDMillipore, #71206)] and processed for western blotting. Protein samples were resolved in 10% Bis-  
22 Tris polyacrylamide gels (Bio-Rad #345-0113) and transferred to nitrocellulose membranes.  
23 Visualization was performed on an Odyssey infrared imaging system (LI-COR Biosciences).

24

1 **Chromatin immunoprecipitation assay (ChIP)**

2 LnCaP-FGC cells were plated at a density of  $3 \times 10^6$  in 10 cm dishes in 10ml of CS-FBS media. After 3 days,  
3 cells were treated with compounds for 6 h. For DHT stimulation experiments, cells were treated with  
4 compounds for 30 minutes prior to addition of 5 nM DHT. Cells were fixed with formaldehyde (1% final)  
5 (ThermoFisher #28908) at room temperature for 10 min and quenched with glycine (0.125M final) for 5  
6 min. The cells were then washed 2X with cold PBS and cell pellets were flash frozen at -80 °C until  
7 processed for ChIP. Briefly, cells were resuspended in 100ul Lysis Buffer (1% SDS, 10  $\mu$ M EDTA, 50  $\mu$ M  
8 Tris pH 8.0, 5 mM NaButyrate), vortexed 4 times during 10 min incubation on ice and sonicated using a  
9 Diagenode Bioruptor 300 at 4 rounds of 5 cycles of 30 sec with 45 sec rest. Samples were centrifuged  
10 for 15min at 20,000 g at 4 °C and 400  $\mu$ l of Buffer B (0.01% SDS, 16.7  $\mu$ M Tris pH 8.0, 1  $\mu$ M EDTA, 167  $\mu$ M  
11 NaCl, 1.1% Triton X-100, 5 mM NaButyrate) was added to the supernatant. Samples were then  
12 processed on a Diagenode IP Star according to the manufacturer's instructions. Immunoprecipitations  
13 (IPs) used 2  $\mu$ g H2K27Ac (Active Motif #39685) or 5  $\mu$ g AR (Millipore #06-608) antibodies and 50  $\mu$ l of  
14 Protein G or A Dynabeads, respectively (Life Technology A10002D and 10004D) with 5  $\mu$ g/ml BSA. After  
15 IP, immunocomplexes were resuspended in elution buffer (20 mM NaHCO<sub>3</sub>, 1% SDS, 150 mM NaCl) and  
16 cross-links were reversed overnight at 65 °C, followed by 1 h RNase A and proteinase K digestion at 45  
17 °C. DNA was purified using ChIP DNA Clean & Concentrator (Zymo). qPCR was performed with SYBR  
18 (Perfecta, Quanta), using specific primers (listed in **Supplementary Table 16**) on a Bio-Rad CFX384 and  
19 analyzed using DDcT method in Microsoft Excel using negative control regions GAD67 or MYOD.

20

21 **RNA isolation and Gene Expression Microarray**

22 Cell pellets were lysed using Qiazol lysis reagent (Qiagen, Hilden, Germany) followed by RNA extraction  
23 with Qiagen RNeasy mini kit columns according to manufacturer protocols. RNA was subsequently used  
24 for Affymetrix gene expression microarray analysis. RNA was converted to biotin labeled cRNA using the

1 3' IVT plus kit. The labeled cRNA was fragmented and loaded onto Human Genome U133 Plus 2.0 Arrays.  
2 Hybridization, washing, staining and scanning of the arrays were performed with Affymetrix equipment.  
3 All procedures were performed according to manufacturer protocols (Affymetrix, Santa Clara, CA).

#### 5 **Gene expression analysis, statistics and bioinformatics**

6 Rosetta Resolver® gene expression data analysis system (IBM) was used to normalize raw microarray  
7 data, calculate gene expression index and determine significant changes between different experimental  
8 conditions.  $p\text{-value} \leq 0.01$  and fold change  $\geq 2$  or  $\leq -2$  were used as the statistical cut-offs to select  
9 differentially expressed genes from two independent biological replicates. The selected differentially  
10 expressed genes were subjected to bioinformatics analysis using Ingenuity® Pathway Analysis (IPA®),  
11 where the significantly Upstream Regulator effects were selected. The significance of a relatively  
12 activate or inactive regulatory effect was measured by Z-score, where Z-scores  $\geq 2$  or  $\leq -2$  were the  
13 statistical cut-offs for significance [<http://www.ingenuity.com/products/ipa>].

#### 15 ***In Vivo* Pharmacology**

16 All animal studies were conducted in accordance with the guidelines established by the internal  
17 Institutional Animal Care and Use Committee. Tumor volumes did not exceed 15% of total body weight  
18 per IACUC guidelines.

#### 21 **LuCap-77 CR xenograft efficacy studies**

22 The LuCap-77 CR prostate PDX model was provided by Dr. Eva Corey, University of Washington, (Seattle,  
23 Washington, USA). Donor tumors were dissociated and injected as a brie (1:2) into the right flank of 16  
24 week old male C.B.-17 SCID mice on day 0 in a volume of 0.2 ml. Tumors were size matched on day 26  
25 post-inoculation with a mean tumor volume of  $211 \pm 3$  (SEM)  $\text{mm}^3$  with dosing beginning on day 28. No

1 mice on study were excluded from the analysis. Mice were randomized into treatment groups using  
2 Studylog software (Studylog Systems, Inc., South San Francisco, CA) based on tumor volume. Tumor  
3 volume was calculated twice weekly. Measurements of the length (L) and width (W) of the tumor were  
4 taken via electronic caliper and the volume was calculated according to the following equation:  $V = L \times$   
5  $W^2/2$  using Study Director version 3.1 (Studylog Systems, Inc., South San Francisco). Partial blinding was  
6 used. A different technician formulated and dosed compounds while the main investigator randomized  
7 and measured tumor volumes during the study. Tumor growth inhibition was calculated according to  
8 the following equation:  $TGI\% = (\text{mean tumor volume of the control group} - \text{mean tumor volume of the}$   
9  $\text{treated group}) / \text{mean tumor volume of the control group} \times 100$ .

10

#### 11 **LuCap-77 CR xenograft PD studies**

12 LuCap-77 CR xenograft tumors were established in SCID mice and animals were dosed with A-485 as  
13 described above in “LuCap-77 CR xenograft growth studies” for 7 days. Three hours post the final dose,  
14 tumors were harvested and snap frozen on dry ice. For RNA isolation, tumors were homogenized in lysis  
15 solution from the 96 well RNA spin kit (GE Health 25-0500-75) using a Precellys 24 homogenizer (Bertin)  
16 and further processed according to manufacturer’s instructions. For western blotting, tumors were  
17 homogenized in ice cold lysis buffer (as described in “Western blotting”) and centrifuged at 20,000 g for  
18 20 min. The supernatant was then processed for western blotting as described above.

19

#### 20 **Statistical analyses**

21 For animal studies, a one sided t-test was used to determine the number of animals needed to obtain 80%  
22 power at  $\alpha = 0.05$ . For this, if there is 48% tumor reduction compared to that of vehicle group  
23 measured at the same time,  $n=8$  animals per group will give 80% power. A two-tailed paired students t-  
24 test using Microsoft Excel was utilized for statistical significance analyses.

## Supplemental References

- 1 1. Thompson, P.R. *et al.* Regulation of the p300 HAT domain via a novel activation loop. *Nat. Struct. Mol. Biol.* **11**, 308-315 (2004).
- 2
- 3 2. Vonrhein, C. *et al.* Data processing and analysis with the autoPROC toolbox. *Acta Crystallogr. D Biol. Crystallogr.* **67**, 293-302 (2011).
- 4
- 5 3. McCoy, A.J. *et al.* Phaser crystallographic software. *J. Appl. Crystallogr.* **40**, 658-674 (2007).
- 6 4. Wlodek, S., Skillman, A.G. & Nicholls, A. Automated ligand placement and refinement with a combined force field and shape potential. *Acta Crystallogr. D Biol. Crystallogr.* **62**, 741-749 (2006).
- 7
- 8
- 9 5. Emsley, P. & Cowtan, K. Coot: model-building tools for molecular graphics. *Acta Crystallogr. D Biol. Crystallogr.* **60**, 2126-2132 (2004).
- 10
- 11 6. Murshudov, G.N., Vagin, A.A. & Dodson, E.J. Refinement of macromolecular structures by the maximum-likelihood method. *Acta Crystallogr. D Biol. Crystallogr.* **53**, 240-255 (1997).
- 12
- 13 7. Bricogne, G. *et al.* *BUSTER version 1.11.2*. (Global Phasing Ltd., Cambridge, United Kingdom; 2011).
- 14
- 15 8. Weinert, B.T. *et al.* Accurate quantification of site-specific acetylation stoichiometry reveals the impact of sirtuin deacetylase CobB on the E. coli acetylome. *Mol. Cell. Proteomics* (2017).
- 16
- 17 9. Kelstrup, C.D. *et al.* Rapid and deep proteomes by faster sequencing on a benchtop quadrupole ultra-high-field Orbitrap mass spectrometer. *J. Proteome Res.* **13**, 6187-6195 (2014).
- 18
- 19 10. Cox, J. & Mann, M. MaxQuant enables high peptide identification rates, individualized p.p.b.-range mass accuracies and proteome-wide protein quantification. *Nat. Biotechnol.* **26**, 1367-1372 (2008).
- 20
- 21
